# Supplementary material for: Testing models of reciprocal relations between social influence and integration in STEM across the college years
Source: PubMed Central journal article supplement (PMC7494109; doi:10.1371/journal.pone.0238250), 2020-09-16
Supplement: pone.0238250.s004.pdf [file pone.0238250.s004.pdf]

1 **S1 Table. Summary of descriptive statistics and correlations between predictors, mediators, and outcomes across time.**

| Variable                              | 1.      | 2.     | 3.     | 4.     | 5.     | 6.     | 7.     | 8.     | 9.     | 10.    | 11.    | 12.    |
|---------------------------------------|---------|--------|--------|--------|--------|--------|--------|--------|--------|--------|--------|--------|
| 1. Female                             | --      |        |        |        |        |        |        |        |        |        |        |        |
| 2. Science Efficacy (T1)              | -.12**  | .81    |        |        |        |        |        |        |        |        |        |        |
| 3. Science Efficacy (T2)              | -.12**  | .40*** | .90    |        |        |        |        |        |        |        |        |        |
| 4. Science Efficacy (T3)              | -.15*** | .37*** | .55*** | .89    |        |        |        |        |        |        |        |        |
| 5. Science Efficacy (T4)              | -.05    | .38*** | .44*** | .50*** | .88    |        |        |        |        |        |        |        |
| 6. Science Efficacy (T5)              | -.03    | .36*** | .33*** | .47*** | .19*** | .89    |        |        |        |        |        |        |
| 7. Science Identity (T1)              | -.07    | .48*** | .32*** | .34*** | .22*** | .24*** | .88    |        |        |        |        |        |
| 8. Science Identity (T2)              | -.09    | .24*** | .50*** | .38*** | .29*** | .31*** | .56*** | .88    |        |        |        |        |
| 9. Science Identity (T3)              | -.07    | .26*** | .33*** | .53*** | .37*** | .34*** | .51*** | .58*** | .90    |        |        |        |
| 10. Science Identity (T4)             | -.03    | .24*** | .32*** | .36*** | .52*** | .43*** | .38*** | .51*** | .61*** | .90    |        |        |
| 11. Science Identity (T5)             | .03     | .24*** | .29*** | .27*** | .36*** | .55*** | .38*** | .53*** | .51*** | .58*** | .91    |        |
| 12. Science Community Values (T1)     | -.11**  | .45*** | .30*** | .29*** | .15**  | .14**  | .64*** | .40*** | .39*** | .29*** | .23*** | .88    |
| 13. Science Community Values (T2)     | -.08    | .24*** | .49*** | .33*** | .29*** | .22*** | .44*** | .60*** | .45*** | .35*** | .40*** | .49*** |
| 14. Science Community Values (T3)     | -.08    | .24*** | .32*** | .44*** | .33*** | .28*** | .39*** | .43*** | .61*** | .46*** | .36*** | .49*** |
| 15. Science Community Values (T4)     | -.05    | .15**  | .25*** | .24*** | .42*** | .28*** | .28*** | .32*** | .40*** | .58*** | .42*** | .32*** |
| 16. Science Community Values (T5)     | -.01    | .20*** | .30*** | .23*** | .22*** | .38*** | .19*** | .31*** | .32*** | .31*** | .49*** | .23*** |
| 17. Scientific Career Intentions (T1) | .07     | .33*** | .16*** | .23*** | .12**  | .17*** | .68*** | .43*** | .41*** | .30*** | .30*** | .51*** |
| 18. Scientific Career Intentions (T2) | .04     | .15**  | .32*** | .20*** | .21*** | .22*** | .41*** | .56*** | .42*** | .40*** | .39*** | .28*** |
| 19. Scientific Career Intentions (T3) | .07     | .15**  | .18*** | .24*** | .21*** | .22*** | .35*** | .33*** | .54*** | .41*** | .36*** | .30*** |
| 20. Scientific Career Intentions (T4) | .08     | .14**  | .21*** | .16*** | .35*** | .27*** | .36*** | .37*** | .43*** | .61*** | .41*** | .22*** |
| 21. Scientific Career Intentions (T5) | .13**   | .16**  | .16**  | .19*** | .25*** | .40*** | .23*** | .27*** | .39*** | .44*** | .60*** | .14*** |
| 22. Mentor Network Diversity (T1)     | .15***  | .05    | .05    | .05    | -.04   | .03    | .10*   | .16**  | .03    | .02    | .06    | .09**  |
| 23. Mentor Network Diversity (T2)     | .06     | .01    | .15*** | .07    | .05    | .08    | .09    | .17*** | .09    | .07    | .12*   | .02    |
| 24. Mentor Network Diversity (T3)     | .12**   | .07    | .00    | .13**  | .06    | .08    | .06    | .08    | .16*** | .14**  | .15**  | .03    |
| 25. Mentor Network Diversity (T4)     | .14***  | .05    | .03    | .11*   | .07    | .06    | .10*   | .12*   | .19*** | .17*** | .10*   | .07    |
| 26. Mentor Network Diversity (T5)     | .17***  | .02    | .01    | .03    | .08    | .16*** | .05    | .06    | .14**  | .18*** | .22*** | -.01   |
| 27. Faculty Mentoring Practices (T2)  | -.09    | .09    | .33*** | .21*   | .14    | .03    | .08    | .30*** | .15    | -.02   | .11    | .08    |
| 28. Faculty Mentoring Practices (T3)  | -.02    | .14    | .21*   | .23*** | .12    | .22**  | .16*   | .10    | .10    | .12    | .17*   | .15*   |
| 29. Faculty Mentoring Practices (T4)  | .05     | .10    | .13    | .20**  | .24*** | .23**  | .07    | .04    | .18*   | .20**  | .15*   | .09    |
| 30. Faculty Mentoring Practices (T5)  | .02     | .03    | .14    | .15*   | .01    | .11    | .01    | -.06   | .00    | .00    | .03    | .01    |
| 31. Research Experiences (T2)         | .10*    | .08    | .14    | .10*   | .04    | .07    | .20*** | .22*** | .07    | .07    | .08    | .12*   |
| 32. Research Experiences (T3)         | .08     | .09    | .10*   | .18*** | .11*   | .13**  | .20*** | .23*** | .24*** | .18*** | .21*** | .17*** |
| 33. Research Experiences (T4)         | .05     | .19*** | .06    | .17*** | .16*** | .19*** | .25*** | .25*** | .28*** | .29*** | .29*** | .20*** |
| 34. Research Experiences (T5)         | .06     | .15**  | .04    | .11*   | .09*   | .20*** | .20*** | .20*** | .31*** | .32*** | .35*** | .16*** |

2 Table continues...

3

4 S1 Table continued...

| Variable                              | 13.    | 14.    | 15.    | 16.    | 17.    | 18.    | 19.    | 20.    | 21.    | 22.    | 23.    | 24.    |
|---------------------------------------|--------|--------|--------|--------|--------|--------|--------|--------|--------|--------|--------|--------|
| 13. Science Community Values (T2)     | .91    |        |        |        |        |        |        |        |        |        |        |        |
| 14. Science Community Values (T3)     | .54*** | .91    |        |        |        |        |        |        |        |        |        |        |
| 15. Science Community Values (T4)     | .47*** | .53*** | .89    |        |        |        |        |        |        |        |        |        |
| 16. Science Community Values (T5)     | .38*** | .37*** | .37*** | .87    |        |        |        |        |        |        |        |        |
| 17. Scientific Career Intentions (T1) | .32*** | .32*** | .19*** | .12*   | .71    |        |        |        |        |        |        |        |
| 18. Scientific Career Intentions (T2) | .55*** | .40*** | .35*** | .27*** | .51*** | .73    |        |        |        |        |        |        |
| 19. Scientific Career Intentions (T3) | .36*** | .52*** | .32*** | .24*** | .44*** | .57*** | .70    |        |        |        |        |        |
| 20. Scientific Career Intentions (T4) | .34*** | .40*** | .49*** | .24*** | .43*** | .54*** | .61*** | .68    |        |        |        |        |
| 21. Scientific Career Intentions (T5) | .30*** | .34*** | .37*** | .33*** | .34*** | .46*** | .56*** | .59*** | .61    |        |        |        |
| 22. Mentor Network Diversity (T1)     | .04    | .08    | -.06   | -.01   | .06    | .16**  | .07    | .07    | .11*   | --     |        |        |
| 23. Mentor Network Diversity (T2)     | .14**  | .04    | .02    | .01    | .08    | .15**  | .08    | .08    | .04    | .27*** | --     |        |
| 24. Mentor Network Diversity (T3)     | .05    | .13**  | .06    | .10*   | .11*   | .10*   | .12**  | .13**  | .14**  | .24*** | .42*** | --     |
| 25. Mentor Network Diversity (T4)     | .09    | .16*** | .15*** | .13**  | .09*   | .11*   | .15*** | .15*** | .18*** | .01    | .32*** | .51*** |
| 26. Mentor Network Diversity (T5)     | .02    | .09    | .14**  | .09    | .04    | .13*   | .13**  | .18*** | .25*** | .28*** | .30*** | .39*** |
| 27. Faculty Mentoring Practices (T2)  | .22*   | .12    | -.07   | .20    | .06    | .13    | .03    | -.02   | .13    | .01    | .09    | -.01   |
| 28. Faculty Mentoring Practices (T3)  | .12    | .11    | .07    | .09    | .08    | .06    | .08    | .08    | .14    | .05    | .01    | .15*   |
| 29. Faculty Mentoring Practices (T4)  | .07    | .27*** | .29*** | .10    | .00    | .04    | .23*** | .19**  | .26**  | .05    | .08    | .30*** |
| 30. Faculty Mentoring Practices (T5)  | -.02   | .00    | .06    | .07    | .00    | .12    | -.03   | .03    | .07    | .09    | .10    | .20**  |
| 31. Research Experiences (T2)         | .17    | .16*** | .06    | .07    | .19*** | .18*** | .13*   | .13**  | .15**  | .16**  | .23*** | .24*** |
| 32. Research Experiences (T3)         | .18*** | .22*** | .11*   | .17*** | .21*** | .20*** | .20*** | .19*** | .18*** | .09    | .19*** | .31*** |
| 33. Research Experiences (T4)         | .22*** | .24*** | .19*** | .16*** | .23*** | .23*** | .29*** | .28*** | .29*** | .13*** | .21*** | .33*** |
| 34. Research Experiences (T5)         | .19*** | .22*** | .22*** | .21*** | .21*** | .23*** | .30*** | .26*** | .40*** | .14**  | .13**  | .28*** |

5 Table continues...

6 S1 Table continued...

| Variable                             | 25.    | 26.    | 27.  | 28.    | 29.    | 30. | 31.    | 32.    | 33.    | 34. |
|--------------------------------------|--------|--------|------|--------|--------|-----|--------|--------|--------|-----|
| 25. Mentor Network Diversity (T4)    | --     |        |      |        |        |     |        |        |        |     |
| 26. Mentor Network Diversity (T5)    | .51*** | --     |      |        |        |     |        |        |        |     |
| 27. Faculty Mentoring Practices (T2) | .03    | .02    | .92  |        |        |     |        |        |        |     |
| 28. Faculty Mentoring Practices (T3) | .15*   | .19*   | .25* | .88    |        |     |        |        |        |     |
| 29. Faculty Mentoring Practices (T4) | .24*** | .23*** | .08  | .49*** | .90    |     |        |        |        |     |
| 30. Faculty Mentoring Practices (T5) | .22*** | .17**  | .05  | .28*** | .41*** | .91 |        |        |        |     |
| 31. Research Experiences (T2)        | .20*** | .13*   | .12  | .04    | .07    | .12 | --     |        |        |     |
| 32. Research Experiences (T3)        | .30*** | .15**  | .10  | .03    | .00    | .02 | .39*** | --     |        |     |
| 33. Research Experiences (T4)        | .40*** | .26*** | .11  | .05    | .11    | .00 | .32*** | .67*** | --     |     |
| 34. Research Experiences (T5)        | .36*** | .36*** | -.03 | .03    | .17*   | .11 | .22*** | .46*** | .59*** | --  |

7 S1 Table Notes: Cronbach's alphas are presented on the diagonals. \* $p \leq .05$ , \*\* $p \leq .01$ , \*\*\* $p \leq .001$

8
