# Supplementary material for: Testing models of reciprocal relations between social influence and integration in STEM across the college years
Source: PubMed Central journal article supplement (PMC7494109; doi:10.1371/journal.pone.0238250), 2020-09-16
Supplement: pone.0238250.s006.pdf [file pone.0238250.s006.pdf]

20 **S3 Table. Summary of model fit and model comparison statistics for nested longitudinal mediation analysis models (N=751).**

| <i>Model</i>                                                                                                                                                                                                    | $\chi^2$<br>( <i>df</i> ) | <i>CFI</i> | <i>SRMR</i> | <i>RMSEA</i><br>[90% <i>CI</i> ] | <i>Model Comparison</i><br>( <i>Pass?</i> ) |
|-----------------------------------------------------------------------------------------------------------------------------------------------------------------------------------------------------------------|---------------------------|------------|-------------|----------------------------------|---------------------------------------------|
| 1. Full forward cross-lagged panel model + contemporaneous mediation paths; all paths freely estimated.                                                                                                         | 212.67<br>(104)***        | .982       | .043        | .037<br>[.030, .044]             | n/a                                         |
| 2. Only first-order stability and cross-lagged panel + contemporaneous mediation; all paths freely estimated.                                                                                                   | 827.29<br>(296)***        | .914       | .084        | .049<br>[.045, .053]             | 1 vs 2<br>(No)                              |
| 3. First- and higher-order stability, but first-order cross-lagged + contemporaneous mediation; all paths freely estimated.                                                                                     | 418.88<br>(260)***        | .974       | .052        | .029<br>[.023, .033]             | 1 vs 3<br>(Yes)                             |
| 4. First-order stability, but first- and higher-order cross-lagged + contemporaneous mediation; all paths freely estimated.                                                                                     | 563.51<br>(140)***        | .931       | .056        | .063<br>[.058, .069]             | 1 vs 4<br>(No)                              |
| 5. Full forward cross-lagged panel model + no contemporaneous mediation; all paths freely estimated.                                                                                                            | 698.22<br>(158)***        | .912       | .074        | .067<br>[.062, .073]             | 1 vs 5<br>(No)                              |
| 6. First- and higher-order stability, but first-order cross-lagged + contemporaneous mediation; invariance of cross-lagged paths across time (developmental equilibrium).                                       | 521.75<br>(342)***        | .971       | .056        | .026<br>[.022, .031]             | 3 vs 6<br>(Yes)                             |
| 7. First- and higher-order stability, but first-order cross-lagged + contemporaneous mediation; invariance of cross-lagged and stability paths across time (developmental + stability equilibrium).             | 675.61<br>(378)***        | .952       | .068        | .032<br>[.028, .036]             | 6 vs 7<br>(No)                              |
| 8. First- and higher-order stability, but first-order cross-lagged + contemporaneous mediation; invariance of cross-lagged and contemporaneous paths across time (developmental + contemporaneous equilibrium). | 608.65<br>(387)***        | .964       | .060        | .028<br>[.023, .032]             | 6 vs 8<br>(Yes)                             |

21 S3 Table Notes: Model 1 T-size results for equivalent testing were as follows (a) CFI = .970 and (b) RMSEA = .045; Model 1 T-size  
 22 results relative to descriptive cutoff values were as follows for CFI (a) Excellent = .989, (b) Close = .950, (c) Fair = .920 and for  
 23 RMSEA (a) Excellent = .022, (b) Close = .057, (c) Fair = .087; Model 8 T-Size results for equivalent testing were as follows (a) CFI =  
 24 .946 and (b) RMSEA = .032; Model 8 T-size results relative to descriptive cutoff values were as follows for CFI (a) Excellent = .985,  
 25 (b) Close = .942, (c) Fair = .909 and for RMSEA (a) Excellent = .017, (b) Close = .055, (c) Fair = .088.

26 \*\*\* $p \leq .001$

27
