# Supplementary material for: Testing models of reciprocal relations between social influence and integration in STEM across the college years
Source: PubMed Central journal article supplement (PMC7494109; doi:10.1371/journal.pone.0238250), 2020-09-16
Supplement: pone.0238250.s007.pdf [file pone.0238250.s007.pdf]

28 **S4 Table. Summary of standardized structural coefficients predicting engagement with social influence agents, social influence processes,**  
 29 **and integration into STEM in the first-year of college (Model 8, N=751).**

| <i>Time</i>                                             | <i>Predictors</i>        | <i>T2 1<sup>st</sup> Year of College Outcomes</i> |                         |                         |                       |                                 |                               |                             |
|---------------------------------------------------------|--------------------------|---------------------------------------------------|-------------------------|-------------------------|-----------------------|---------------------------------|-------------------------------|-----------------------------|
|                                                         |                          | <i>Persistence Intentions</i>                     | <i>Science Efficacy</i> | <i>Science Identity</i> | <i>Science Values</i> | <i>Mentor Network Diversity</i> | <i>Faculty Mentor Support</i> | <i>Research Experiences</i> |
| T1 Pre-college                                          | Persistence Intentions   | <u>.47***</u>                                     | .06**                   | .13***                  | .07***                | -.03                            | -.02                          | .11***                      |
|                                                         | Science Efficacy         | -.08***                                           | <u>.34***</u>           |                         |                       | -.02                            | .05                           | -.04                        |
|                                                         | Science Identity         | -.14***                                           |                         | <u>.42***</u>           |                       | .06                             | -.05                          | .16***                      |
|                                                         | Science Values           | -.06*                                             |                         |                         | <u>.43***</u>         | -.01                            | .06                           | .02                         |
|                                                         | Mentor Network Diversity | .02                                               | -.07*                   | -.04                    | -.04                  | <u>.24***</u>                   |                               |                             |
| T2 1 <sup>st</sup> year of college<br>(Contemporaneous) | Science Efficacy         | .05*                                              |                         |                         |                       |                                 |                               |                             |
|                                                         | Science Identity         | .32***                                            |                         |                         |                       |                                 |                               |                             |
|                                                         | Science Values           | .21***                                            |                         |                         |                       |                                 |                               |                             |
|                                                         | Mentor Network Diversity | .01                                               | .06**                   | .06**                   | .05**                 |                                 |                               |                             |
|                                                         | Faculty Mentor Support   | -.01                                              | .15***                  | .14***                  | .11**                 |                                 |                               |                             |
| Research Experiences                                    | .03                      | .05**                                             | .08***                  | .03                     |                       |                                 |                               |                             |
| <i>R</i> <sup>2</sup>                                   |                          | .47                                               | .18                     | .32                     | .25                   | .07                             | .01                           | .06                         |

30 S4 Table Note: T1 = pre-college, T2 = spring 1st year of college, T3 = spring 2nd year of college, T4 = fall 3rd year of college, T5 = spring 4th  
 31 year of college. All standardized structural coefficients ascertained from STDXY in Mplus as all variables were continuous. Underlined values  
 32 represent stability coefficients, coefficients in standard text associated with predictors from the pre-college are first-order cross-lagged  
 33 coefficients, and coefficients associated with predictors from the 1<sup>st</sup> year of college are contemporaneous. The B-H FDR procedure was used to  
 34 determine the statistical significance of all unstandardized coefficients. Based on the FDR procedure, all *p*-values less than .023 for unstandardized  
 35 coefficients are reported statistically significant.

36 \**p* ≤ .023, \*\**p* ≤ .01, \*\*\**p* ≤ .001

37

38
