# Supplementary material for: Testing models of reciprocal relations between social influence and integration in STEM across the college years
Source: PubMed Central journal article supplement (PMC7494109; doi:10.1371/journal.pone.0238250), 2020-09-16
Supplement: pone.0238250.s008.pdf [file pone.0238250.s008.pdf]

39 **S5 Table. Summary of standardized structural coefficients for social influence factors, social influence processes, and integration in the**  
 40 **second-year of college (Model 8, N=751).**

| Time                                                    | Predictors               | T3 2 <sup>nd</sup> Year of College Outcomes |                  |                  |                |                          |                        |                      |
|---------------------------------------------------------|--------------------------|---------------------------------------------|------------------|------------------|----------------|--------------------------|------------------------|----------------------|
|                                                         |                          | Persistence Intentions                      | Science Efficacy | Science Identity | Science Values | Mentor Network Diversity | Faculty Mentor Support | Research Experiences |
| T1 or Pre-college                                       | Persistence Intentions   | <u>.08</u>                                  |                  |                  |                |                          |                        |                      |
|                                                         | Science Efficacy         |                                             | <u>.19***</u>    |                  |                |                          |                        |                      |
|                                                         | Science Identity         |                                             |                  | <u>.22***</u>    |                |                          |                        |                      |
|                                                         | Science Values           |                                             |                  |                  | <u>.28***</u>  |                          |                        |                      |
|                                                         | Mentor Network Diversity |                                             |                  |                  |                | <u>.16***</u>            |                        |                      |
| T2 or 1 <sup>st</sup> year of college                   | Persistence Intentions   | <u>.42***</u>                               | .07**            | .14***           | .08***         | .03                      | -.02                   | .10***               |
|                                                         | Science Efficacy         | -.09***                                     | <u>.42***</u>    |                  |                | -.02                     | .07                    | -.04                 |
|                                                         | Science Identity         | -.13***                                     |                  | <u>.36***</u>    |                | .05                      | -.05                   | .12***               |
|                                                         | Science Values           | -.06*                                       |                  |                  | <u>.36***</u>  | -.01                     | .07                    | .02                  |
|                                                         | Mentor Network Diversity | .02                                         | -.06*            | -.03             | -.03           | <u>.35***</u>            |                        |                      |
|                                                         | Faculty Mentor Support   | .05                                         | -.03             | -.04             | -.05           |                          | <u>.25*</u>            |                      |
| T3 or 2 <sup>nd</sup> year of college (Contemporaneous) | Research Experiences     | .003                                        | -.01             | -.04             | -.02           |                          |                        | <u>.30***</u>        |
|                                                         | Science Efficacy         | .05*                                        |                  |                  |                |                          |                        |                      |
|                                                         | Science Identity         | .32***                                      |                  |                  |                |                          |                        |                      |
|                                                         | Science Values           | .19***                                      |                  |                  |                |                          |                        |                      |
|                                                         | Mentor Network Diversity | .01                                         | .07**            | .06**            | .05**          |                          |                        |                      |
|                                                         | Faculty Mentor Support   | -.01                                        | .15***           | .13***           | .11**          |                          |                        |                      |
|                                                         | Research Experiences     | .04                                         | .06**            | .10***           | .04            |                          |                        |                      |
| <i>R</i> <sup>2</sup>                                   |                          | .49                                         | .36              | .41              | .38            | .18                      | .08                    | .15                  |

41 S5 Table Note: All standardized structural coefficients ascertained from STDXY in Mplus as all variables were continuous. Underlined values  
 42 represent stability coefficients, coefficients in standard text associated with predictors from the pre-college are first-order cross-lagged  
 43 coefficients, and coefficients associated with predictors from the 1<sup>st</sup> year of college are contemporaneous. The B-H FDR procedure was used to  
 44 determine the statistical significance of all unstandardized coefficients. Based on the FDR procedure, all *p*-values less than .023 for unstandardized  
 45 coefficients are reported statistically significant.

46 \**p*≤.023, \*\**p*≤.01, \*\*\**p*≤.001

47

48
