# Supplementary material for: Testing models of reciprocal relations between social influence and integration in STEM across the college years
Source: PubMed Central journal article supplement (PMC7494109; doi:10.1371/journal.pone.0238250), 2020-09-16
Supplement: pone.0238250.s009.pdf [file pone.0238250.s009.pdf]

49 **S6 Table. Summary of standardized structural coefficients for social influence factors, social influence processes, and integration in the**  
 50 **third-year of college (Model 8, N=751).**

| Time                                                    | Predictors               | T4 3 <sup>rd</sup> Year of College Outcomes |                  |                  |                |                          |                        |                      |
|---------------------------------------------------------|--------------------------|---------------------------------------------|------------------|------------------|----------------|--------------------------|------------------------|----------------------|
|                                                         |                          | Persistence Intentions                      | Science Efficacy | Science Identity | Science Values | Mentor Network Diversity | Faculty Mentor Support | Research Experiences |
| T1 or Pre-college                                       | Persistence Intentions   | <u>.13**</u>                                |                  |                  |                |                          |                        |                      |
|                                                         | Science Efficacy         |                                             | <u>.17***</u>    |                  |                |                          |                        |                      |
|                                                         | Science Identity         |                                             |                  | <u>.01</u>       |                |                          |                        |                      |
|                                                         | Science Values           |                                             |                  |                  | <u>.04</u>     |                          |                        |                      |
|                                                         | Mentor Network Diversity |                                             |                  |                  |                | <u>.08</u>               |                        |                      |
| T2 1 <sup>st</sup> year of college                      | Persistence Intentions   | <u>.15***</u>                               |                  |                  |                |                          |                        |                      |
|                                                         | Science Efficacy         |                                             | <u>.19***</u>    |                  |                |                          |                        |                      |
|                                                         | Science Identity         |                                             |                  | <u>.29***</u>    |                |                          |                        |                      |
|                                                         | Science Values           |                                             |                  |                  | <u>.27***</u>  |                          |                        |                      |
|                                                         | Mentor Network Diversity |                                             |                  |                  |                | <u>.10*</u>              |                        |                      |
|                                                         | Faculty Mentor Support   |                                             |                  |                  |                |                          | <u>-.05</u>            |                      |
|                                                         | Research Experiences     |                                             |                  |                  |                |                          |                        | <u>.07</u>           |
| T3 2 <sup>nd</sup> year of college                      | Persistence Intentions   | <u>.38***</u>                               | <u>.07***</u>    | <u>.14***</u>    | <u>.11***</u>  | .03                      | -.02                   | <u>.08***</u>        |
|                                                         | Science Efficacy         | <u>-.08***</u>                              | <u>.27***</u>    |                  |                | -.02                     | .06                    | -.03                 |
|                                                         | Science Identity         | <u>-.13***</u>                              |                  | <u>.30***</u>    |                | .05                      | -.05                   | <u>.11***</u>        |
|                                                         | Science Values           | <u>-.06*</u>                                |                  |                  | <u>.27***</u>  | -.01                     | .06                    | .02                  |
|                                                         | Mentor Network Diversity | .02                                         | -.06*            | -.03             | -.05           | <u>.41***</u>            |                        |                      |
|                                                         | Faculty Mentor Support   | .05                                         | -.03             | -.03             | -.07           |                          | <u>.55***</u>          |                      |
|                                                         | Research Experiences     | .003                                        | -.02             | -.05             | -.03           |                          |                        | <u>.58***</u>        |
| T4 3 <sup>rd</sup> year of college<br>(Contemporaneous) | Science Efficacy         | .05*                                        |                  |                  |                |                          |                        |                      |
|                                                         | Science Identity         | .34***                                      |                  |                  |                |                          |                        |                      |
|                                                         | Science Values           | .13***                                      |                  |                  |                |                          |                        |                      |
|                                                         | Mentor Network Diversity | .01                                         | .07**            | .06**            | .08**          |                          |                        |                      |
|                                                         | Faculty Mentor Support   | -.01                                        | .15***           | .12***           | .15**          |                          |                        |                      |
|                                                         | Research Experiences     | .05                                         | .08**            | .11***           | .07            |                          |                        |                      |
|                                                         | <i>R</i> <sup>2</sup>    |                                             | .59              | .33              | .44            | .35                      | .25                    | .32                  |

51 S6 Table Note: All standardized structural coefficients ascertained from STDXY in Mplus as all variables were continuous. Underlined values  
 52 represent stability coefficients, coefficients in standard text associated with predictors from the pre-college are first-order cross-lagged  
 53 coefficients, and coefficients associated with predictors from the 1<sup>st</sup> year of college are contemporaneous. The B-H FDR procedure was used to  
 54 determine the statistical significance of all unstandardized coefficients. Based on the FDR procedure, all *p*-values less than .023 for unstandardized  
 55 coefficients are reported statistically significant.

56 \* $p \leq .023$ , \*\* $p \leq .01$ , \*\*\* $p \leq .001$   
57  
58  
59
