# Supplementary material for: Testing models of reciprocal relations between social influence and integration in STEM across the college years
Source: PubMed Central journal article supplement (PMC7494109; doi:10.1371/journal.pone.0238250), 2020-09-16
Supplement: pone.0238250.s010.pdf [file pone.0238250.s010.pdf]

60 **S7 Table. Summary of standardized structural coefficients for social influence factors, social influence processes, and integration in the**  
 61 **fourth-year of college (Model 8, N=751).**

| <i>Time</i>                                          | <i>Predictors</i>        | <i>T5 4<sup>th</sup> Year of College Outcomes</i> |                         |                         |                       |                                 |                               |                             |
|------------------------------------------------------|--------------------------|---------------------------------------------------|-------------------------|-------------------------|-----------------------|---------------------------------|-------------------------------|-----------------------------|
|                                                      |                          | <i>Persistence Intentions</i>                     | <i>Science Efficacy</i> | <i>Science Identity</i> | <i>Science Values</i> | <i>Mentor Network Diversity</i> | <i>Faculty Mentor Support</i> | <i>Research Experiences</i> |
| T1 Pre-college                                       | Persistence Intentions   | <u>-.01</u>                                       |                         |                         |                       |                                 |                               |                             |
|                                                      | Science Efficacy         |                                                   | <u>.11*</u>             |                         |                       |                                 |                               |                             |
|                                                      | Science Identity         |                                                   |                         | <u>.04</u>              |                       |                                 |                               |                             |
|                                                      | Science Values           |                                                   |                         |                         | <u>.03</u>            |                                 |                               |                             |
|                                                      | Mentor Network Diversity |                                                   |                         |                         |                       | <u>.12**</u>                    |                               |                             |
| T2 1 <sup>st</sup> year of college                   | Persistence Intentions   | <u>.05</u>                                        |                         |                         |                       |                                 |                               |                             |
|                                                      | Science Efficacy         |                                                   | <u>-.001</u>            |                         |                       |                                 |                               |                             |
|                                                      | Science Identity         |                                                   |                         | <u>.23***</u>           |                       |                                 |                               |                             |
|                                                      | Science Values           |                                                   |                         |                         | <u>.18**</u>          |                                 |                               |                             |
|                                                      | Mentor Network Diversity |                                                   |                         |                         |                       | <u>.11*</u>                     |                               |                             |
| T3 2 <sup>nd</sup> year of college                   | Faculty Mentor Support   |                                                   |                         |                         |                       |                                 | <u>.03</u>                    |                             |
|                                                      | Research Experiences     |                                                   |                         |                         |                       |                                 |                               | <u>-.02</u>                 |
|                                                      | Persistence Intentions   | <u>.20***</u>                                     |                         |                         |                       |                                 |                               |                             |
|                                                      | Science Efficacy         |                                                   | <u>.26***</u>           |                         |                       |                                 |                               |                             |
|                                                      | Science Identity         |                                                   |                         | <u>.14**</u>            |                       |                                 |                               |                             |
| T4 3 <sup>rd</sup> year of college                   | Science Values           |                                                   |                         |                         | <u>.15**</u>          |                                 |                               |                             |
|                                                      | Mentor Network Diversity |                                                   |                         |                         |                       | <u>.10</u>                      |                               |                             |
|                                                      | Faculty Mentor Support   |                                                   |                         |                         |                       |                                 | <u>.12</u>                    |                             |
|                                                      | Research Experiences     |                                                   |                         |                         |                       |                                 |                               | <u>.13**</u>                |
|                                                      | Persistence Intentions   | <u>.36***</u>                                     | <u>.07**</u>            | <u>.13***</u>           | <u>.08***</u>         | .03                             | -.02                          | <u>.07***</u>               |
| T5 4 <sup>th</sup> year of college (Contemporaneous) | Science Efficacy         | <u>-.08***</u>                                    | <u>.26***</u>           |                         |                       | -.02                            | .06                           | -.03                        |
|                                                      | Science Identity         | <u>-.13***</u>                                    |                         | <u>.23***</u>           |                       | .05                             | -.05                          | <u>.10***</u>               |
|                                                      | Science Values           | <u>-.04*</u>                                      |                         |                         | <u>.11</u>            | -.01                            | .04                           | .01                         |
|                                                      | Mentor Network Diversity | .02                                               | -.06*                   | -.03                    | -.04                  | <u>.36***</u>                   |                               |                             |
|                                                      | Faculty Mentor Support   | .05                                               | -.03                    | -.03                    | -.05                  |                                 | <u>.35***</u>                 |                             |
| T5 4 <sup>th</sup> year of college (Contemporaneous) | Research Experiences     | .004                                              | -.02                    | -.06                    | -.03                  |                                 |                               | <u>.46***</u>               |
|                                                      | Science Efficacy         | .05*                                              |                         |                         |                       |                                 |                               |                             |
|                                                      | Science Identity         | <u>.33***</u>                                     |                         |                         |                       |                                 |                               |                             |
|                                                      | Science Values           | <u>.17***</u>                                     |                         |                         |                       |                                 |                               |                             |
|                                                      | Mentor Network Diversity | .01                                               | <u>.07**</u>            | <u>.06**</u>            | <u>.06**</u>          |                                 |                               |                             |
| Faculty Mentor Support                               | -.01                     | <u>.15***</u>                                     | <u>.12***</u>           | <u>.12**</u>            |                       |                                 |                               |                             |
| Research Experiences                                 | .05                      | <u>.08**</u>                                      | <u>.12***</u>           | <u>.06</u>              |                       |                                 |                               |                             |

| <i>Time</i>          | <i>Predictors</i> | <i>T5 4<sup>th</sup> Year of College Outcomes</i> |                         |                         |                       |                                 |                               |                             |
|----------------------|-------------------|---------------------------------------------------|-------------------------|-------------------------|-----------------------|---------------------------------|-------------------------------|-----------------------------|
|                      |                   | <i>Persistence Intentions</i>                     | <i>Science Efficacy</i> | <i>Science Identity</i> | <i>Science Values</i> | <i>Mentor Network Diversity</i> | <i>Faculty Mentor Support</i> | <i>Research Experiences</i> |
| <i>R<sup>2</sup></i> |                   | .58                                               | .34                     | .43                     | .21                   | .28                             | .20                           | .37                         |

62 S7 Table Note: All standardized structural coefficients ascertained from STDXY in Mplus as all variables were continuous. Underlined values  
 63 represent stability coefficients, coefficients in standard text associated with predictors from the pre-college are first-order cross-lagged  
 64 coefficients, and coefficients associated with predictors from the 1<sup>st</sup> year of college are contemporaneous. The B-H FDR procedure was used to  
 65 determine the statistical significance of all unstandardized coefficients. Based on the FDR procedure, all *p*-values less than .023 for unstandardized  
 66 coefficients are reported statistically significant.  
 67 \**p*≤.023, \*\**p*≤.01, \*\*\**p*≤.001  
 68  
 69
